# Supplementary material for: Effect of Different Types of Intermittent Fasting on Biochemical and Anthropometric Parameters among Patients with Metabolic-Associated Fatty Liver Disease (MAFLD)—A Systematic Review
Source: MDPI journal article supplement (doi:10.3390/nu14010091), 2021-12-26
Supplement: s1 [file s1]

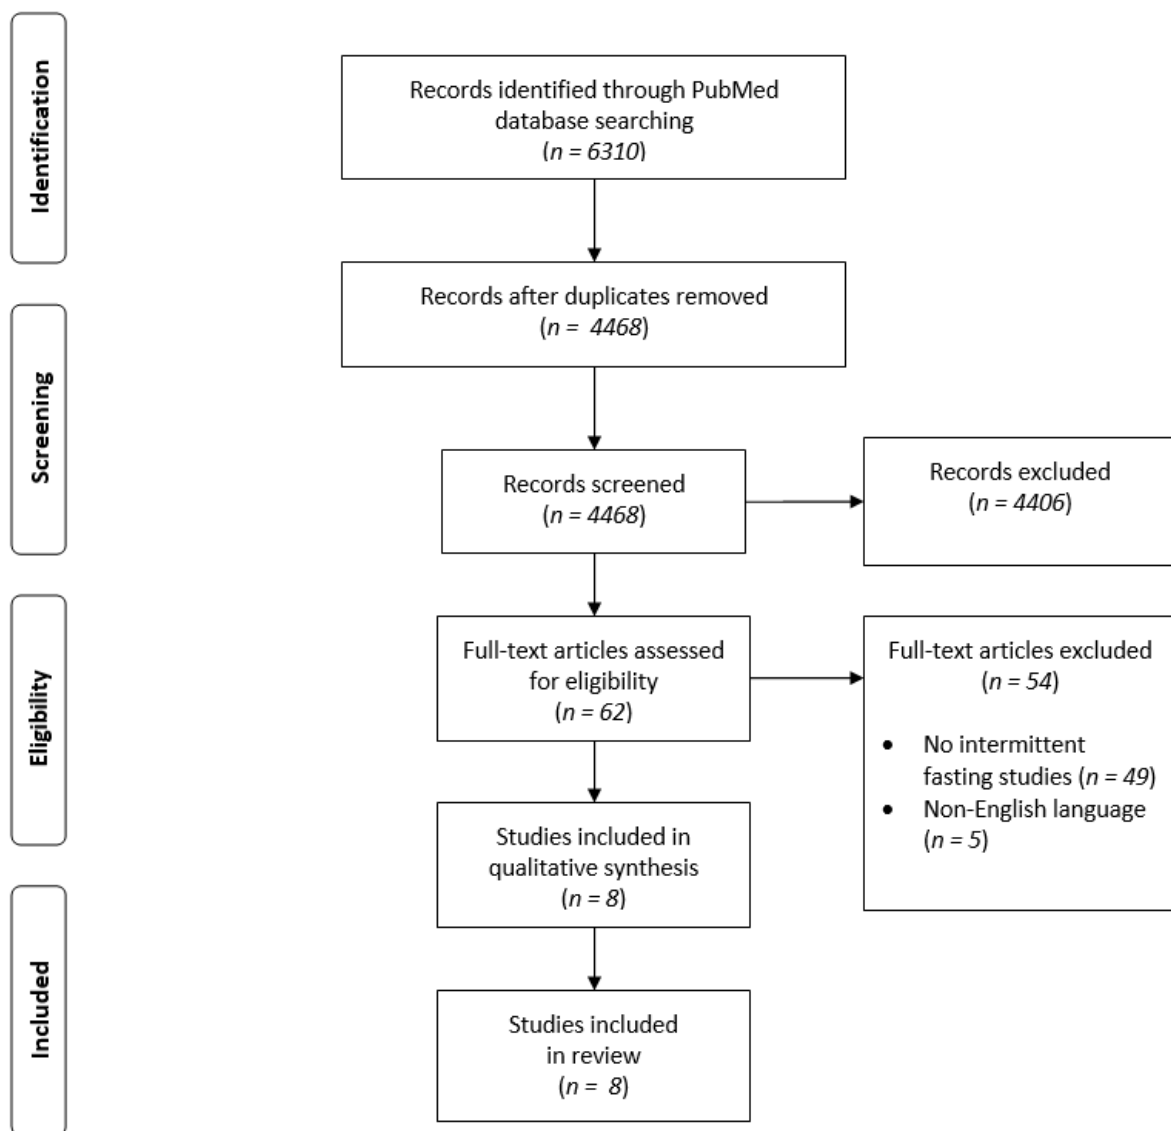

**Figure S1.** PRISMA flow diagram of the study selection from PubMed database.

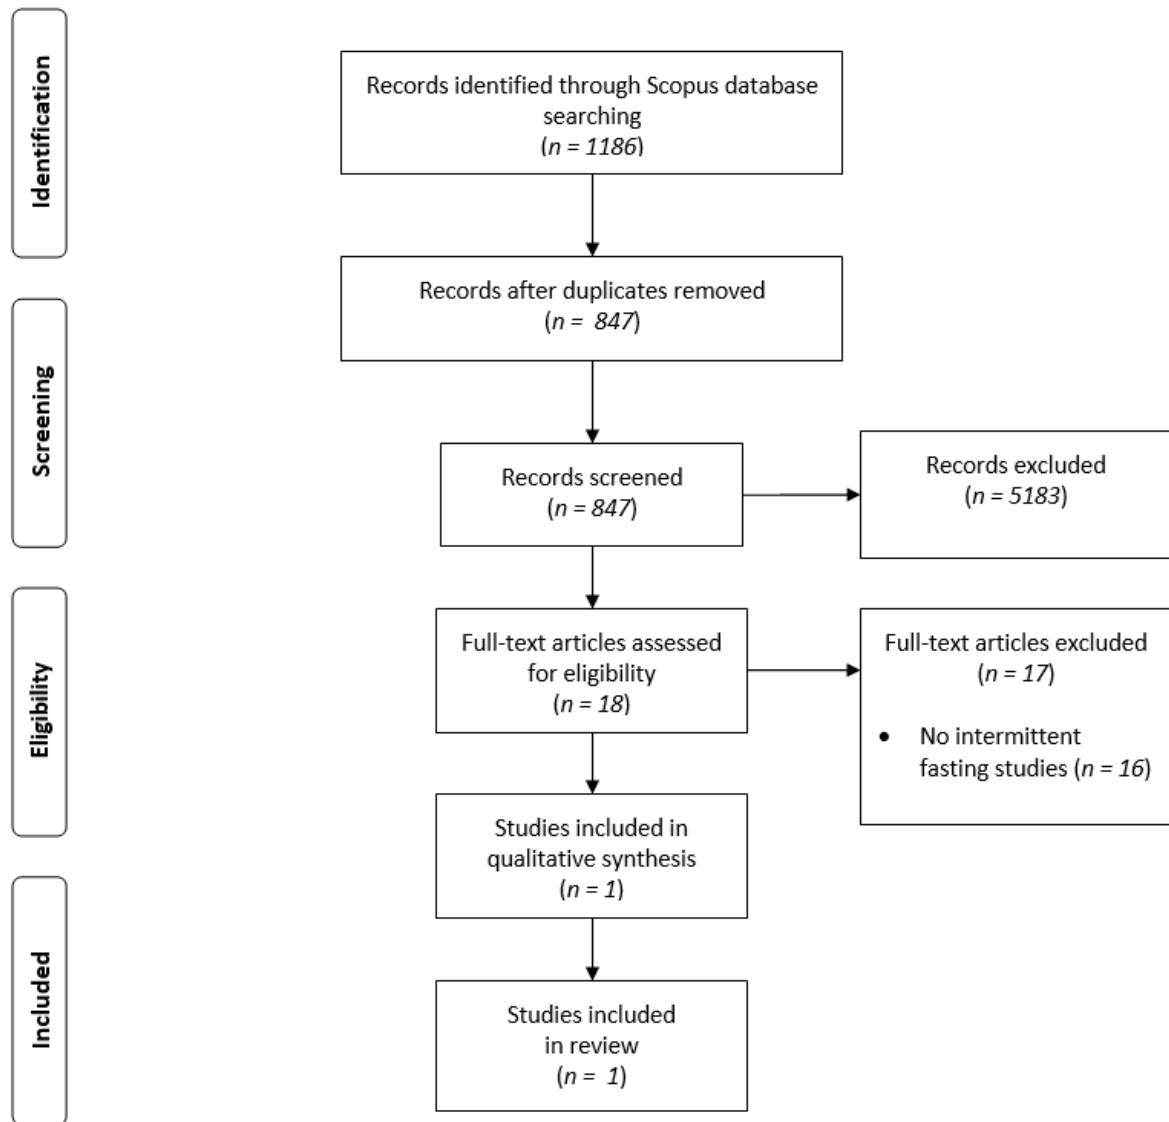

Figure S2. PRISMA flow diagram of the study selection from Scopus database.

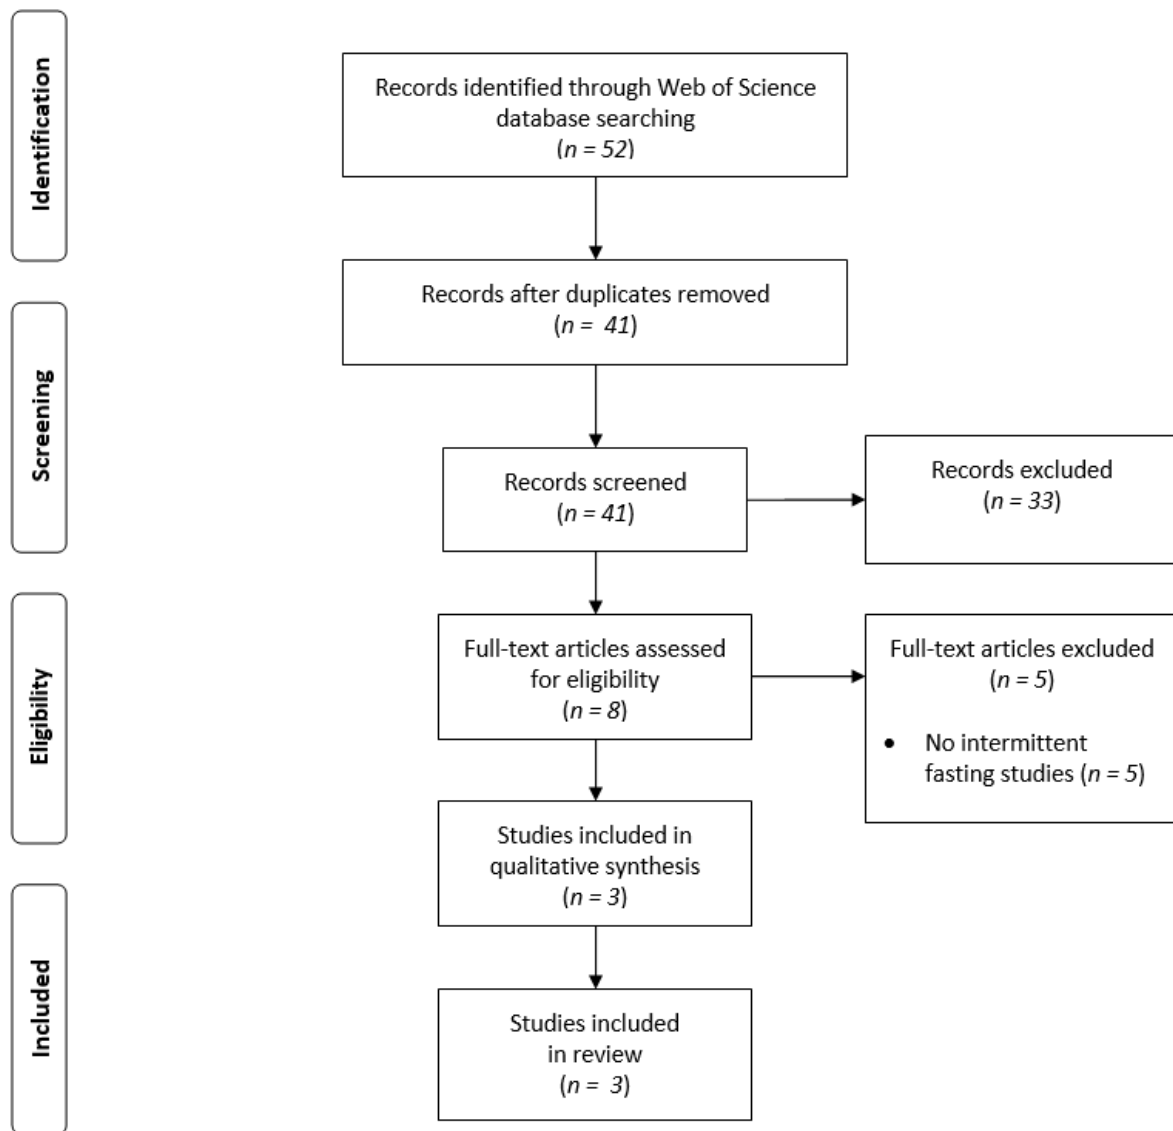

**Figure S3.** PRISMA flow diagram of the study selection from Web of Science database.
